# Supplementary material for: Collaborative networks enable the rapid establishment of serological assays for SARS-CoV-2 during nationwide lockdown in New Zealand
Source: PubMed Central journal article supplement (PMC7474877; doi:10.7717/peerj.9863), 2020-09-03

**Supplementary Figure 1.** Serum IgG reactivity of pre-pandemic healthy adult controls with human coronavirus S proteins. ELISA were performed with sera (n=31) against S1 proteins of one  $\beta$ - (HKU1) and two  $\alpha$ -HCoV (NL63 and 229E) as well as S1 and Spike proteins of SARS-CoV2. The cutoff of OD >0.2 is indicated for reference to SARS-CoV2 spike protein ELISA. IVIG is indicated as pink squares.

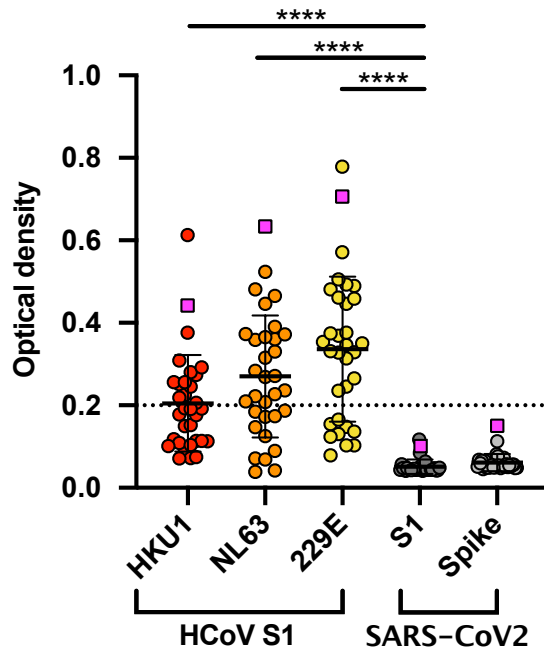

Supplement: peerj-08-9863-s002.pdf [file peerj-08-9863-s002.pdf]
