# Supplementary material for: Collaborative networks enable the rapid establishment of serological assays for SARS-CoV-2 during nationwide lockdown in New Zealand
Source: PeerJ. 2020 Sep 3;8:e9863. doi: 10.7717/peerj.9863 (PMC7474877; doi:10.7717/peerj.9863)
Supplement: Supplemental Information 1 — The data for the RBD ELISA are shown as optical density (OD), and the data for the Spike ELISA are shown as titration. The sVNT data is percentage inhibition (%). [file peerj-08-9863-s001.xlsx]

## Sheet: Sheet1
			2-step ELISA				Surrogate Neutralization
			Interpretation of results (as per OD)				Interpretation of results (as per % inhibition)
			OD	Titre	Interpretation		% Inhibition	Interpretation
			>0.2 and -->	≥ 300	Positive		<20	Positive			Notes:
			<0.2 or >0.2 and -->	< 300	Negative		>20	Negative			Obtained <7 days from symptom onset
											PCR negative, symptomatic, seropositive
SID	Description	Sars-CoV-2 PCR	RBD	Spike	Result		% Inhibition	Result
UOA1	pre-pandemic	n/a	0.02		Negative		0.347222	Negative
UOA2	pre-pandemic	n/a	0.0205		Negative		0	Negative
UOA3	pre-pandemic	n/a	0.01425		Negative		1.64931	Negative
UOA4	pre-pandemic	n/a	0.036		Negative		2.19097	Negative
UOA5	pre-pandemic	n/a	0.012		Negative		0	Negative
UOA6	pre-pandemic	n/a	0.0485		Negative		0	Negative
UOA7	pre-pandemic	n/a	0.0315		Negative		0	Negative
UOA8	pre-pandemic	n/a	0.0175		Negative		0	Negative
UOA9	pre-pandemic	n/a	0.025		Negative		5.31646	Negative
UOA10	pre-pandemic	n/a	0.015		Negative		0	Negative
UOA11	pre-pandemic	n/a	0.024		Negative		0	Negative
UOA12	pre-pandemic	n/a	0.0145		Negative		17.7887	Negative
UOA13	pre-pandemic	n/a	0.0135		Negative		1.12847	Negative
UOA14	pre-pandemic	n/a	0.014		Negative		16.694	Negative
UOA15	pre-pandemic	n/a	0.0155		Negative		0	Negative
UOA16	pre-pandemic	n/a	0.014		Negative		0	Negative
UOA17	pre-pandemic	n/a	0.019		Negative		3.34477	Negative
UOA18	pre-pandemic	n/a	0.017		Negative		0	Negative
UOA19	pre-pandemic	n/a	0.016		Negative		4.60069	Negative
UOA20	pre-pandemic	n/a	0.16075		Negative		8.50694	Negative
UOA21	pre-pandemic	n/a	0.0635		Negative		7.71746	Negative
UOA22	pre-pandemic	n/a	0.018		Negative		0	Negative
UOA23	pre-pandemic	n/a	0.013		Negative		2.77959	Negative
UOA24	pre-pandemic	n/a	0.0345		Negative		0	Negative
UOA25	pre-pandemic	n/a	0.0325		Negative		0	Negative
UOA26	pre-pandemic	n/a	0.038		Negative		9.375	Negative
UOA27	pre-pandemic	n/a	0.0595		Negative		0	Negative
UOA28	pre-pandemic	n/a	0.0315		Negative		6.89993	Negative
UOA29	pre-pandemic	n/a	0.011		Negative		6.51042	Negative
UOA30	pre-pandemic	n/a	0.032		Negative		4.77431	Negative
UOA31	pre-pandemic	n/a	0.0195		Negative		5.20833	Negative
UOA32	pre-pandemic	n/a	0.016		Negative		3.48101	Negative
UOA33	pre-pandemic	n/a	0.0365		Negative		10.1899	Negative
UOA34	pre-pandemic	n/a	0.027		Negative		3.79747	Negative
UOA35	pre-pandemic	n/a	0.0125		Negative		3.86076	Negative
UOA36	pre-pandemic	n/a	0.019		Negative		8.48101	Negative
UOA37	pre-pandemic	n/a	0.028		Negative		7.53165	Negative
UOA38	pre-pandemic	n/a	0.0505		Negative		13.6709	Negative
UOA39	pre-pandemic	n/a	0.0585		Negative		7.34177	Negative
UOA40	pre-pandemic	n/a	0.0165		Negative		0.523218	Negative
UOA41	pre-pandemic	n/a	0.03375		Negative		0	Negative
UOA42	pre-pandemic	n/a	0.062		Negative		0	Negative
UOA43	pre-pandemic	n/a	0.03175		Negative		0	Negative
UOA44	pre-pandemic	n/a	0.02425		Negative		0	Negative
UOA45	pre-pandemic	n/a	0.0325		Negative		6.09722	Negative
UOA46	pre-pandemic	n/a	0.06225		Negative		9.97471	Negative
UOA47	pre-pandemic	n/a	0.0145		Negative		10.4243	Negative
UOA48	pre-pandemic	n/a	0.02375		Negative		8.00787	Negative
UOA49	pre-pandemic	n/a	0.05225		Negative		7.9604	Negative
UOA50	pre-pandemic	n/a	0.038		Negative		9.06931	Negative
UOA51	pre-pandemic	n/a	0.23925	<100	Negative		8.81226	Negative
UOA52	pre-pandemic	n/a	0.02075		Negative		7.0099	Negative
UOA53	pre-pandemic	n/a	0.06375		Negative		5.16678	Negative
UOA54	pre-pandemic	n/a	0.03975		Negative		4.9505	Negative
UOA55	pre-pandemic	n/a	0.033		Negative		0.990099	Negative
UOA56	pre-pandemic	n/a	0.08875		Negative		1.92937	Negative
UOA57	pre-pandemic	n/a	0.01825		Negative		0	Negative
UOA58	pre-pandemic	n/a	0.02525		Negative		0	Negative
UOA59	pre-pandemic	n/a	0.05475		Negative		3.29861	Negative
UOA60	pre-pandemic	n/a	0.06775		Negative		8.15972	Negative
UOA61	pre-pandemic	n/a	0.129		Negative		8.85417	Negative
UOA62	pre-pandemic	n/a	0.06475		Negative		9.54861	Negative
UOA63	pre-pandemic	n/a	0.062		Negative		10.5035	Negative
UOA64	pre-pandemic	n/a	0.04425		Negative		5.03472	Negative
UOA65	pre-pandemic	n/a	0.0375		Negative		1.64931	Negative
UOA66	pre-pandemic	n/a	0.03725		Negative		5.13407	Negative
UOA67	pre-pandemic	n/a	0.035		Negative		3.29861	Negative
UOA68	pre-pandemic	n/a	0.05075		Negative		6.21321	Negative
UOA69	pre-pandemic	n/a	0.02075		Negative		3.64583	Negative
UOA70	pre-pandemic	n/a	0.02025		Negative		8.85417	Negative
UOA71	pre-pandemic	n/a	0.07875		Negative		8.42014	Negative
UOA72	pre-pandemic	n/a	0.03525		Negative		12.4132	Negative
UOA73	pre-pandemic	n/a	0.14975		Negative		12.7848	Negative
UOA74	pre-pandemic	n/a	0.031		Negative		15.0174	Negative
UOA75	pre-pandemic	n/a	0.29375	<100	Negative		11.3164	Negative
UOA76	pre-pandemic	n/a	0.1955		Negative		7.18354	Negative
UOA77	pre-pandemic	n/a	0.05175		Negative		4.6875	Negative
UOA78	pre-pandemic	n/a	0.04225		Negative		15.19	Negative
UOA79	pre-pandemic	n/a	0.03875		Negative		1.64931	Negative
UOA80	pre-pandemic	n/a	0.04775		Negative		0	Negative
UOA81	pre-pandemic	n/a	0.1625		Negative		5.20833	Negative
UOA82	pre-pandemic	n/a	0.0415		Negative		13.3681	Negative
UOA83	pre-pandemic	n/a	0.03		Negative		15.1899	Negative
UOA84	pre-pandemic	n/a	0.065		Negative		14.3229	Negative
UOA85	pre-pandemic	n/a	0.0585		Negative		13.1944	Negative
UOA86	pre-pandemic	n/a	0.049		Negative		13.7153	Negative
UOA87	pre-pandemic	n/a	0.29725	<100	Negative		14.6552	Negative
UOA88	pre-pandemic	n/a	0.072		Negative		7.55208	Negative
UOA89	pre-pandemic	n/a	0.033		Negative		1.04167	Negative
UOA90	pre-pandemic	n/a	0.0565		Negative		0.78125	Negative
UOA91	pre-pandemic	n/a	0.079		Negative		5.55919	Negative
UOA92	pre-pandemic	n/a	0.1875		Negative		0	Negative
UOA93	pre-pandemic	n/a	0.0155		Negative		0	Negative
UOA94	pre-pandemic	n/a	0.0185		Negative		0	Negative
UOA95	pre-pandemic	n/a	0.056		Negative		0	Negative
UOA96	pre-pandemic	n/a	0.042		Negative		6.55226	Negative
UOA97	pre-pandemic	n/a	0.026		Negative		0	Negative
UOA98	pre-pandemic	n/a	0.014		Negative		0	Negative
UOA99	pre-pandemic	n/a	0.0165		Negative		1.56006	Negative
UOA100	pre-pandemic	n/a	0.019		Negative		10.5304	Negative
UOA101	pre-pandemic	n/a	0.0275		Negative		0	Negative
UOA102	pre-pandemic	n/a	0.0175		Negative		0	Negative
UOA103	pre-pandemic	n/a	0.014		Negative		0	Negative
UOA104	pre-pandemic	n/a	0.028		Negative		11.6225	Negative
UOA105	pre-pandemic	n/a	0.069		Negative		0	Negative
UOA106	pre-pandemic	n/a	0.03		Negative		0	Negative
UOA107	pre-pandemic	n/a	0.045		Negative		0	Negative
UOA108	pre-pandemic	n/a	0.0095		Negative		0	Negative
UOA109	pre-pandemic	n/a	0.023		Negative		0	Negative
UOA110	pre-pandemic	n/a	0.029		Negative		0	Negative
UOA111	pre-pandemic	n/a	0.0505		Negative		0	Negative
UOA112	pre-pandemic	n/a	0.029		Negative		0	Negative
UOA113	pre-pandemic	n/a	0.136		Negative		0	Negative
UOA114	2020-pandemic	yes	0.17	100	Negative		18.5276	Negative
UOA115	2020-pandemic	neg	0.014	<100	Negative		0.28481	Negative
UOA116	2020-pandemic	yes	0.9476	2700	Positive		89.1352	Positive
UOA117	2020-pandemic	yes	0.558	300	Positive		41.0399	Positive
UOA118	2020-pandemic	yes	0.9825	2700	Positive		83.5796	Positive
UOA119	2020-pandemic	yes	0.39825	300	Positive		44.1981	Positive
UOA120	2020-pandemic	yes	0.5935	900	Positive		19.8139	Negative
UOA121	2020-pandemic	yes	0.6765	900	Positive		55.1266	Positive
UOA122	2020-pandemic	yes	1.00125	24300	Positive		93.2403	Positive
UOA123	2020-pandemic	yes	0.09775	<100	Negative		22.1714	Positive
UOA124	2020-pandemic	yes	0.5635	900	Positive		63.0477	Positive
UOA125	2020-pandemic	yes	0.74	900	Positive		76.2263	Positive
UOA126	2020-pandemic	yes	1.043	8100	Positive		94.1138	Positive
UOA127	2020-pandemic	neg	0.023		Negative		4.71698	Negative
UOA128	2020-pandemic	yes	0.321	300	Positive		26.9294	Positive
UOA129	2020-pandemic	yes	0.59	900	Positive		62.5	Positive
UOA130	2020-pandemic	yes	1.081	2700	Positive		78.5988	Positive
UOA131	2020-pandemic	neg	0.009		Negative		5.23156	Negative
UOA132	2020-pandemic	neg	0.017		Negative		4.2024	Negative
UOA133	2020-pandemic	neg	0.051		Negative		0	Negative
UOA134	2020-pandemic	neg	0.017		Negative		0	Negative
UOA135	2020-pandemic	neg	0.018		Negative		0	Negative
UOA136	2020-pandemic	neg	0.032		Negative		0	Negative
UOA137	2020-pandemic	neg	0.1		Negative		0.857633	Negative
UOA138	2020-pandemic	neg	0.026		Negative		3.08748	Negative
UOA139	2020-pandemic	neg	0.021		Negative		2.83019	Negative
UOA140	2020-pandemic	neg	0.021		Negative		1.28645	Negative
UOA141	2020-pandemic	neg	0.026		Negative		0	Negative
UOA142	2020-pandemic	neg	0.013		Negative		0	Negative
UOA143	2020-pandemic	neg	0.022		Negative		0	Negative
UOA144	2020-pandemic	neg	0.021		Negative		0	Negative
UOA145	2020-pandemic	yes	0.442	300	Positive		24.1139	Positive
UOA146	2020-pandemic	yes	1.01	2700	Positive		78.9557	Positive
UOA147	2020-pandemic	neg	0.018		Negative		0	Negative
UOA148	2020-pandemic	neg	0.008		Negative		0.943396	Negative
UOA149	2020-pandemic	neg	0.021		Negative		0	Negative
UOA150	2020-pandemic	neg	0.016		Negative		2.91595	Negative
UOA151	2020-pandemic	neg	0.026		Negative		0	Negative
UOA152	2020-pandemic	neg	0.012		Negative		0	Negative
UOA153	2020-pandemic	neg	0.012		Negative		0	Negative
UOA154	2020-pandemic	neg	0.02		Negative		0	Negative
UOA155	2020-pandemic	neg	0.01		Negative		0	Negative
UOA156	2020-pandemic	neg	0.016		Negative		2.40137	Negative
UOA157	2020-pandemic	neg	0.299	<100	Negative		6.89873	Negative
UOA158	2020-pandemic	neg	0.017		Negative		1.11492	Negative
UOA159	2020-pandemic	neg	0.018		Negative		1.88679	Negative
UOA160	2020-pandemic	neg	0.015		Negative		0	Negative
UOA161	2020-pandemic	yes	0.908	2700	Positive		83.1646	Positive
UOA162	2020-pandemic	neg	0.019		Negative		0	Negative
UOA163	2020-pandemic	neg	0.868	2700	Positive		65.4747	Positive
UOA164	2020-pandemic	neg	0.057		Negative		0	Negative
UOA165	2020-pandemic	neg	0.033		Negative		0	Negative
UOA166	2020-pandemic	neg	0.054		Negative		1.54374	Negative
UOA167	2020-pandemic	neg	0.034		Negative		2.83019	Negative
UOA168	2020-pandemic	neg	0.024		Negative		2.05832	Negative
UOA169	2020-pandemic	neg	0.016		Negative		0	Negative
UOA170	2020-pandemic	neg	0.024		Negative		0	Negative
UOA171	2020-pandemic	neg	0.02		Negative		0	Negative
UOA172	2020-pandemic	neg	0.035		Negative		0	Negative
UOA173	2020-pandemic	neg	0.023		Negative		0	Negative
UOA174	2020-pandemic	neg	0.049		Negative		0	Negative
UOA175	2020-pandemic	neg	0.017		Negative		0	Negative
UOA176	2020-pandemic	neg	0.04		Negative		0	Negative
UOA177	2020-pandemic	neg	0.028		Negative		0	Negative
UOA178	2020-pandemic	neg	0.031		Negative		0	Negative
UOA179	2020-pandemic	neg	0.045		Negative		0	Negative
UOA180	2020-pandemic	neg	0.036		Negative		0	Negative
UOA181	2020-pandemic	neg	0.019		Negative		0	Negative
UOA182	2020-pandemic	neg	0.018		Negative		0	Negative
UOA183	2020-pandemic	neg	0.082		Negative		0	Negative
UOA184	2020-pandemic	yes	1.026	2700	Positive		80.9494	Positive
UOA185	2020-pandemic	neg	0.076		Negative		9.391	Negative
UOA186	2020-pandemic	yes	0.965	2700	Positive		88.7835	Positive
UOA187	2020-pandemic	neg	0.031		Negative		0	Negative
UOA188	2020-pandemic	neg	0.014		Negative		0	Negative
UOA189	2020-pandemic	neg	0.014		Negative		0	Negative
UOA190	2020-pandemic	neg	0.022		Negative		0	Negative
UOA191	2020-pandemic	neg	0.11		Negative		2.81188	Negative
UOA192	2020-pandemic	neg	0.018		Negative		4.55446	Negative
UOA193	2020-pandemic	neg	0.02		Negative		1.30693	Negative
UOA194	2020-pandemic	neg	0.032		Negative		2.65347	Negative
UOA195	2020-pandemic	neg	0.027		Negative		0	Negative
UOA196	2020-pandemic	neg	0.03		Negative		6.45545	Negative
UOA197	2020-pandemic	neg	0.014		Negative		4.31683	Negative
UOA198	2020-pandemic	yes	0.766	2700	Positive		84.7129	Positive
UOA199	2020-pandemic	neg	0.02		Negative		10.1782	Negative
UOA200	2020-pandemic	neg	0.021		Negative		6.13861	Negative
UOA201	2020-pandemic	neg	0.071		Negative		5.10891	Negative
UOA202	2020-pandemic	neg	0.021		Negative		6.21782	Negative
UOA203	2020-pandemic	neg	0.02		Negative		2.73267	Negative
UOA204	2020-pandemic	neg	0.01		Negative		5.66337	Negative
UOA205	2020-pandemic	neg	0.009		Negative		4.71287	Negative
UOA206	2020-pandemic	neg	0.018		Negative		9.22772	Negative
UOA207	2020-pandemic	neg	0.015		Negative		5.0297	Negative
UOA208	2020-pandemic	neg	0.024	<100	Negative		0	Negative
UOA209	2020-pandemic	neg	0.035		Negative		7.64356	Negative
UOA210	2020-pandemic	neg	0.042		Negative		0	Negative
UOA211	2020-pandemic	neg	0.239	<100	Negative		5.50495	Negative
UOA212	2020-pandemic	neg	0.017		Negative		0	Negative
UOA213	2020-pandemic	neg	0.027		Negative		0.831683	Negative
UOA214	2020-pandemic	neg	0.016		Negative		0.039604	Negative
UOA215	2020-pandemic	neg	0.033		Negative		4.55446	Negative
UOA216	2020-pandemic	neg	0.024		Negative		8.19802	Negative
